# Supplementary material
Source: PubMed Central journal article supplement (PMC3736717)
Supplement: ASN.2012121148_ASN2012121148SupplementaryData.pdf [file ASN.2012121148_ASN2012121148SupplementaryData.pdf]

## **TNXB MUTATIONS IS A CAUSE OF VESICoureTERAL REFLUX (VUR)**

\*Rasheed A. Gbadegesin<sup>1,2</sup>, Patrick D. Brophy<sup>3</sup>, Adebowale Adeyemo<sup>4</sup>, Gentzon Hall<sup>5,2</sup>, Indra R. Gupta<sup>6</sup>, David Hains<sup>7</sup>, Bartłomiej Bartkowiak<sup>1</sup>, C. Eglar Rabinovich<sup>8</sup>, Settara Chandrasekharappa<sup>4</sup>, Alison Homstad<sup>1,2</sup>, Katherine Westreich<sup>1</sup>, Guanghong Wu<sup>5,2</sup>, Yutao Liu<sup>5,2</sup>, Danniele Holanda<sup>9</sup>, Jason Clarke<sup>3</sup>, Peter Lavin<sup>5,2,10</sup>, Angelica Selim<sup>11</sup>, Sara Miller<sup>11</sup>, John S. Wiener<sup>12</sup>, Sherry S. Ross<sup>12</sup>, John Foreman<sup>1</sup>, Charles Rotimi<sup>4</sup>, Michelle P. Winn<sup>5,2</sup>

## **SUPPLEMENTARY MATERIALS**

## **SUPPLEMENTARY METHODS**

### **Scratch wound healing assay**

Fibroblast cell line was established by culturing skin biopsy samples in modified DMEM. Cells were seeded on collagen-1 coated plates and allowed to grow to confluence prior to scratch wound creation. Scratch wounds were applied using 1000  $\mu$ L pipet tip. Fibroblasts were treated with platelet derived growth factor (PDGF) (Cell Signaling, Inc.; Beverly, MA) at a concentration of 50 ng/ml or vehicle prior to being returned to 37<sup>o</sup>C growth conditions for incubation for 15 hours. Fibroblast wound healing images at 0 and 15 hours were obtained using an EVOS<sup>®</sup> microscope and wound healing was quantified in 4 experiments as the % wound closure.

### **Immunoblotting and reagents**

Following treatment, human epidermal fibroblast cultures were washed with PBS. Cells were harvested in RIPA buffer (Cell Signaling Technologies, Boston, MA, USA). Cell lysates were subjected to SDS-polyacrylamide gel electrophoresis. Protein immunoblotting was performed using rabbit polyclonal anti-FAK antibody or rabbit polyclonal anti-phospho-FAK (Tyr 397) antibody, or rabbit polyclonal TNXB antibody (Proteintech, Inc; Chicago, IL). Immunolabeled proteins were detected using a chemiluminescence detection system (Pierce Biotechnology, Rockford, IL, USA) on Kodax BioMax film (VWR Scientific).

### **Immunohistochemical and Immunofluorescence staining of the UVJ junction**

Paraffin embedded human tissue samples were obtained from the pathology department at the University of Iowa under approval of Institutional Board Review protocol # 200901770. Normal controls were obtained from autopsy specimens and

compared to specimens isolated from individuals with radiographically demonstrated reflux who underwent surgical re-implantation. Block samples were sectioned via microtome into 5-7 micron sections and affixed to microscopy slides. Immunohistochemistry and Immunofluorescence was performed on slide sections that had undergone heating to 55°C and allowed to cool to room temperature. Slides were cleared twice with xylene for 5 minutes. Slide samples were hydrated through a reducing ethanol bath series and rinsed with distilled water and PBS. Slides were then submerged in boiling citrate buffer (10 mM, Ph 6.0), allowed to cool for 1 minute, resubmerged and allowed to cool for 20 minutes to room temperature in antigen retrieval solution. A.) For Immunohistochemistry: Slides were rinsed with distilled water and endogenous peroxidase activity was blocked with 3% hydrogen peroxidase in PBS for 20 min. Slide sections were then rinsed with PBS and incubated with 5% normal goat serum/5% Bovine Serum Albumin for 1 hr at room temp. Avidin-Biotin activity was blocked using a kit: (Invitrogen, Avidin/Biotin Blocking Kit, Cat#: 00-4303) as described by the manufacturer. Slides were subsequently incubated with rabbit anti-tenascin-XB antibody (Proteintech, Inc; Chicago, IL), 1:50 diluted in 1% blocking solution) at 4°C overnight, rinsed in PBS and Incubated with Biotinylated Anti-Rabbit IgG 1:200 (Vector Lab, BA-1000), (7.5ug/ml) diluted in 2% NGS/ PBS 60min at RT and rinsed with PBS. Sections were incubated with VECTASTAIN Elite ABC Reagent per manufacturer's guidelines for 1 hr and rinsed with PBS. Antibody staining was revealed using the DAB Peroxidase Substrate Kit (Vector lab, SK-4100) per manufacturer's guidelines. Sections were rinsed with distilled water, dehydrated through an ethanol/xylene series, coverslipped and visualized under light microscopy. Images are captured using the image capture software in the Microscopy core at the University of Iowa. B.) For Immunofluorescence: slide sections were then rinsed with distilled water, PBS and incubated with 5% normal goat serum/5% Bovine Serum Albumin for 1 hr at room temp.

Slides were incubated with primary antibody (rabbit anti-tenascin-XB, 1:50 diluted in 1% blocking solution) at 4°C overnight, rinsed with PBS and incubated with Dilute Fluorescent 2nd antibody with 1% blocking solution (Alexa Fluor® goat anti-Rabbit 568 1:200) for 1.5 - 2hr at RT, covered from the light. Slides were rinsed with PBS and underwent aqueous mounting, with removal of any remaining buffer and application of 2-3 drops of VECTASHIELD® Mounting Medium (Catalog # H-1000) and coverslipped and allowed to dry for 20 minutes in the dark. Confocal images were obtained immediately using the equipment available in the University of Iowa Microscopy core.

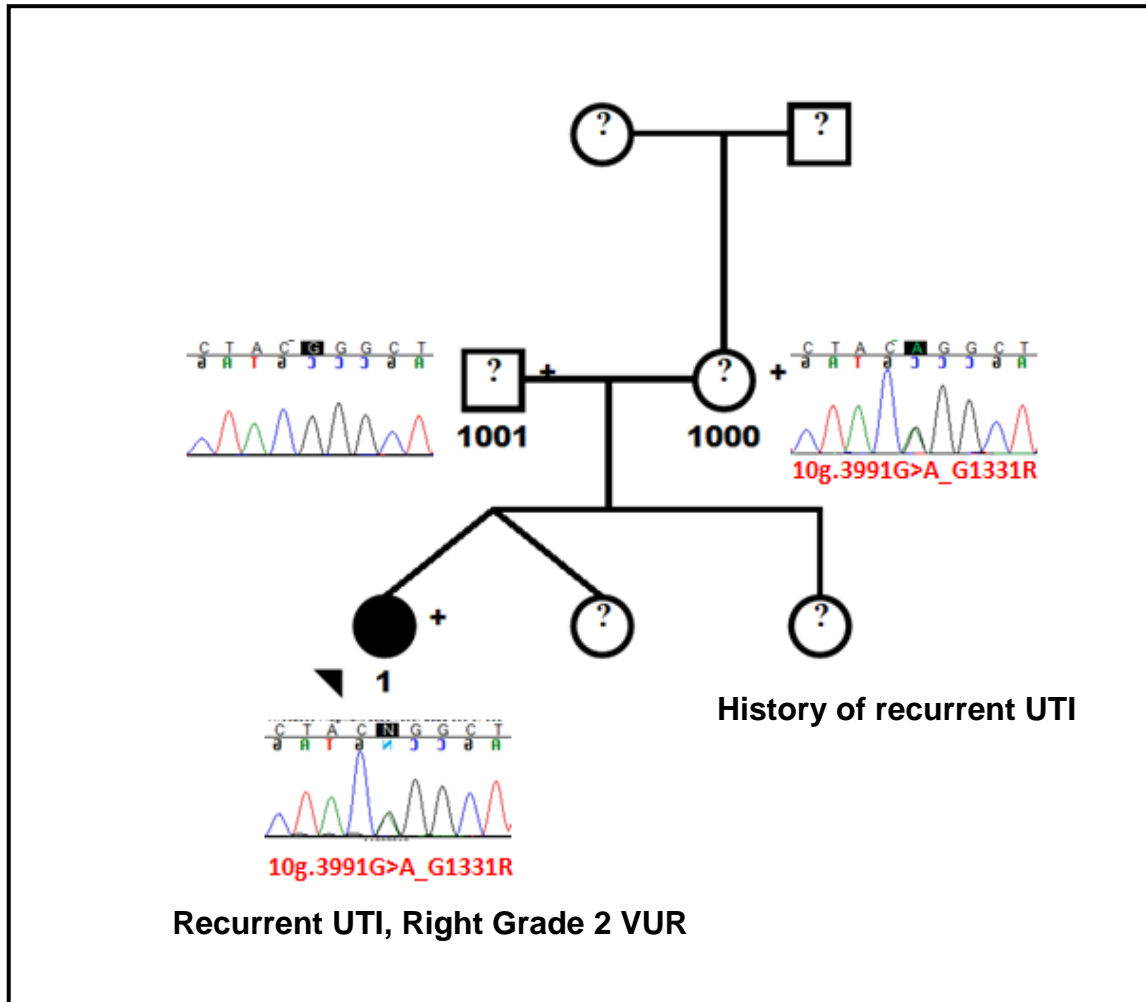

**Figure S1: Pedigree of second family with G1331R mutation.** Squares are males and circles are females. Filled shape denote affected individuals, shapes with question mark denote unknown phenotype. The proband (individual 1) has right grade 2 VUR, her mom (Individual 1000) never had VCUG done. The proband and her mom have the G1331R change.

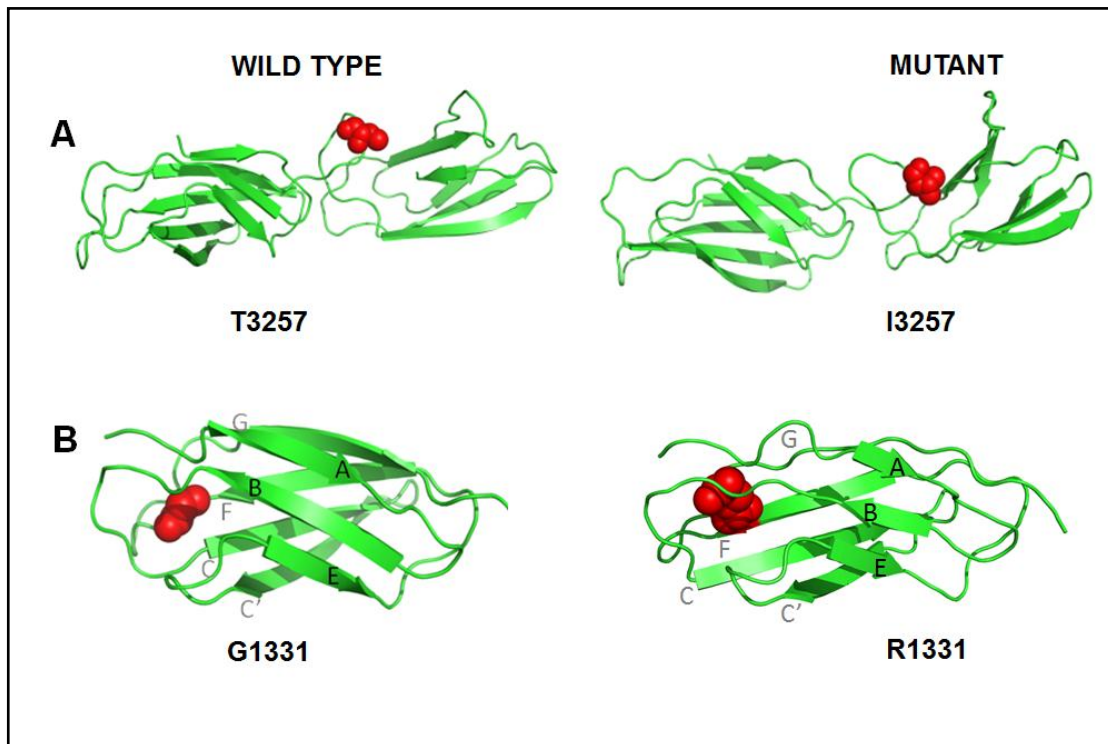

**Figure S2: Location of TNXB mutations in three-dimensional models of the TNXB fibronectin Type III (FnIII) domains.** (A) I-TASSER was used to model the structure of TNXB FnIII domains 23 and 24. Residue T3257 (in red) is predicted to reside in the linker between the two fibronectin domains, modeling the T3257I mutation results in some structural changes. (B) The structure of the 5th FnIII domain of human TNXB was predicted using the I-TASSER server for homology modeling. The beta strands are labeled as designated by Leahy et al. and residue G 1331 is shown as a space-filling model highlighted in red. Structural modeling of the 5th FnIII domain containing the G1331R mutation (again highlighted in red) resulted in, perturbation of the secondary structure of the protein.

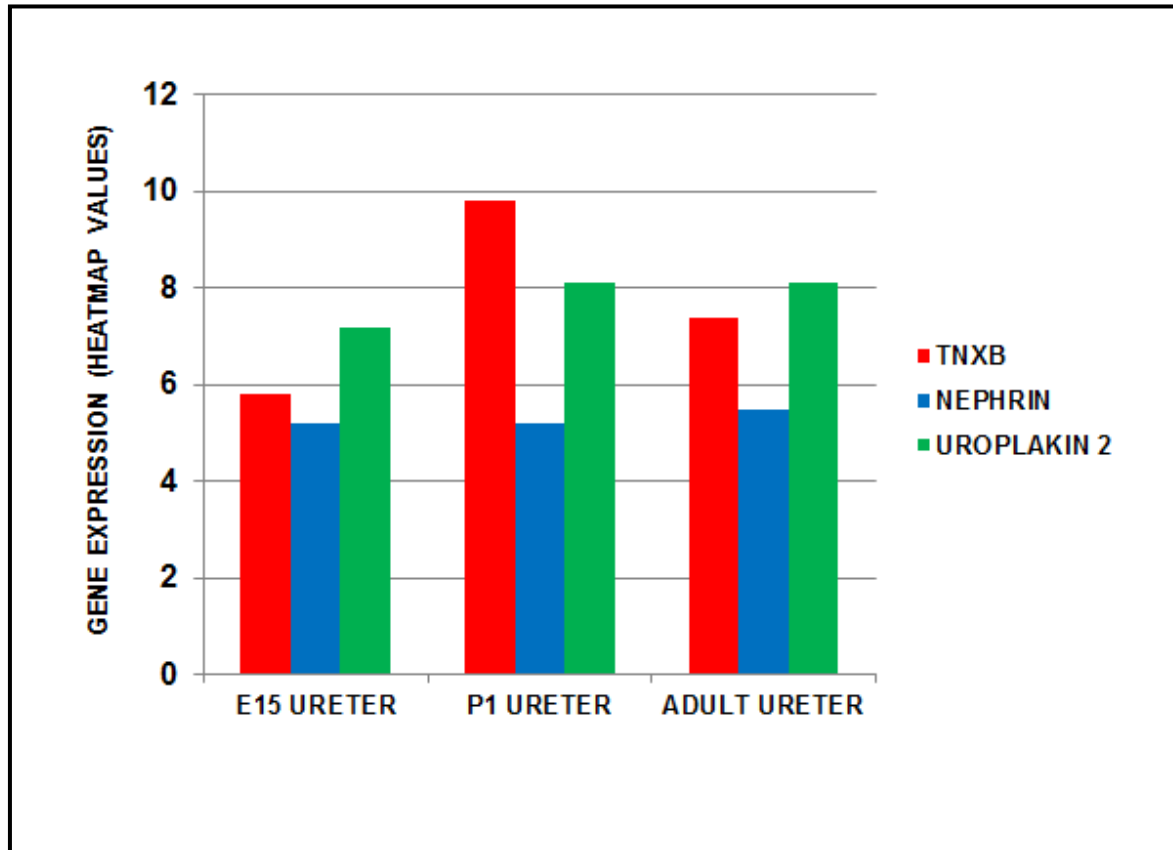

**Figure S3: Microarray expression data for TNXB, nephrin and uroplakin II in mouse ureter.** TNXB is expressed from E15 (Embryonic day 15) and is persistent post natally (P1: postnatal day1) and also in adult ureter, it is relatively more abundant than nephrin a key podocyte gene at every time point but similar to uroplakin II a gene that is enriched in the developing lower genitourinary tract. Relative expression of each gene in Heatmap value is derived from average of three different data set. Data is derived from the publicly available Genitourinary Molecular Anatomy Project ([www.gudmap.org](http://www.gudmap.org)).

**Table S1: Exclusion of previously reported loci for VUR/CAKUT in family 6606**

| <b>LOCI</b>            | <b>MLOD SCORE IN FAMILY 6606</b> |
|------------------------|----------------------------------|
| Chromosome 1p13        | -9.7                             |
| SOX11 Chrom2           | -8.3                             |
| ROBO2 Chrom3           | -11.0                            |
| FRAS1/SPRY1 Chrom4     | -9.1/-0.54                       |
| GDNF Chrom5            | -10.0                            |
| CDC5L Chrom6p21        | 3.3*                             |
| TOP1MT/SOX17/Chrom8q24 | -8.2/-1.1/-8.3                   |
| Chrom10q26             | -16.3                            |
| EMX2                   | -15.6                            |
| PAX2                   | -16.4                            |
| RET                    | -14.8                            |
| NAT10 Chrom11          | -11.8                            |
| Chromosome12p11        | -9.1                             |
| FREM2 Chrom13          | -8.9                             |
| ANGEL1 Chrom14         | -4.5                             |
| HNF1B Chrom17          | -14.7                            |
| USF2 Chrom19           | -8.5                             |
| UPK3A                  | -12.4                            |

\*Mutations in CDC5L was excluded in family 6606 by direct exon sequencing



**Table S2: Primer sequences for TNXB**

| Primer Name | Primer Sequence       |
|-------------|-----------------------|
| TNXB-2F     | CCTCATGGTGAGGAAGGAGT  |
| TNXB-2R     | TCTCCTTTTTGAAGCTGCTCT |
| TNXB-3.1F   | ATGCCACAGTCGTCACCA    |
| TNXB-3.1R   | AGAGCAGAGCTGGGCTACAT  |
| TNXB-3.2F   | GCAATCGGTTCCAGTGTACC  |
| TNXB-3.2R   | GGTCGTTGCGGTGTGCTTT   |
| TNXB-3.3F   | GCAGTCTTCCCCTGAGTAGC  |
| TNXB-3.3R   | GAATGCATTTGCGACACG    |
| TNXB-3.4F   | AGGCACACTCCTGCACAC    |
| TNXB-3.4R   | GAGAACGGCGTGTGTGTTT   |
| TNXB-3.5F   | CCCTCTACACACACACTGG   |
| TNXB-3.5R   | GGAAGGCTACGTGAGTGAGG  |
| TNXB-3.6F   | CATGCTCTCCCTCACTCTT   |
| TNXB-3.6R   | GTGCAAGGAGTGTGCCTGT   |
| TNXB-4F     | GCCATCTGGACTCAACCAAT  |
| TNXB-4R     | CTGAGTAAAAGGGGCTGTGG  |
| TNXB-5F     | GGCAGATTCCCTCTCTAGTCC |
| TNXB-5R     | GAGATAAGGGGGATTGAGCA  |
| TNXB-6F     | CCAGAAGCATTGAGAGGAGT  |
| TNXB-6R     | TGGACTAGAGAGGGAATCTGC |
| TNXB-7F     | CCAATAACCCAGCTCCTC    |
| TNXB-7R     | GGACTGGGGATTCTTTCTAGT |
| TNXB-8F     | CCCAAAGCACTGAGAAAACC  |
| TNXB-8R     | ATCCAGGATGGAGTGGAGTG  |
| TNXB-9F     | CTGACACAGCCAGGGTATGA  |
| TNXB-9R     | CCTATGTGGGATTTGGCTTC  |
| TNXB-10F    | GGCAAATGAGCTGAGAAGG   |
| TNXB-10R    | TGTCAGGCTTCCCAGAAATT  |
| TNXB-11F    | CTGGAGCAAAGGAGCAACT   |
| TNXB-11R    | TTTCCATGGCTGTCATCTGT  |
| TNXB-12F    | GGAGGAGTAAAGGGGTCAGG  |
| TNXB-12R    | GGTGACAGCGAGACTCCATC  |
| TNXB-13F    | CAGGTGGACAAAGGGAAGAC  |
| TNXB-13R    | CCCCATCTCAGTTCACAGC   |
| TNXB-14F    | CTGGGGCCAAATATGGTAA   |
| TNXB-14R    | GCAGTTCTGGGTTTTCCAG   |
| TNXB-15F    | AAAGGGGCACAAGGAAACTT  |
| TNXB-15R    | CCCAGTCTTCCAGAAACAGC  |
| TNXB-16F    | TTCTGAAGGCTTCTCCTCCTC |
| TNXB-16R    | TTTCGATTGCTGACTGCTTG  |
| TNXB-17F    | ACCAAAGAGCAAGAGGGTGA  |
| TNXB-17R    | CTTTCAGATGGCTGGGAGAG  |
| TNXB-18F    | AGGAGATGCTGGAGGCTGTA  |
| TNXB-18R    | CCAGTCATAGCCTTGGCTTC  |
| TNXB-19F    | AGTGAAGGCACAGCAGAA    |
| TNXB-19R    | CCTCAACACCTCCTTGCAAG  |
| TNXB-20F    | ACCAAAGAGCAAGAGGGTGA  |
| TNXB-20R    | GCACCAGCATCCAGACTGT   |
| TNXB-21F    | GGTACCCATGAGGGAAAGGT  |
| TNXB-21R    | CCACGACGTAAGCACATCC   |
| TNXB-22F    | ACTGTGAGCCCATCAAGAC   |
| TNXB-22R    | AGCAAAGCAAGTTGCCCTTA  |
| TNXB-23F    | ACCAAAGAGCAAGAGGGTGA  |
| TNXB-23R    | GGGCACTTTGTGTTTTGTGA  |
| TNXB-24F    | CATGGAAAGCTGCAAAGAA   |
| TNXB-24R    | CTTGAAGACCTGAGCACATCC |
| TNXB-25F    | GTCAGTCTCAGGGAAAGTGG  |
| TNXB-25R    | AACAAAAGATGGCGAGGAGA  |
| TNXB-26F    | CGAAGACTGGAGAGACAGCA  |
| TNXB-26R    | CCTTCTCACAAGACCAAG    |
| TNXB-27F    | CCACCAGTCATCACCAAAAGA |
| TNXB-27R    | GTCCTGTTCTTGGGCACTTT  |
| TNXB-28F    | AAGAGGTGCCAAGATCCAAA  |
| TNXB-28R    | CCAGTCATAGCCTTGGCTTC  |
| TNXB-29F    | ATCAGTGGGTGCTGAGGACT  |
| TNXB-29R    | GCCGCTAAGAAATGCTCACT  |
| TNXB-30F    | GAGGGACTCACTTTCGGAGTT |
| TNXB-30R    | ATAGCAGCCAGGAAGCTC    |
| TNXB-31F    | TTGTCTTCAGCCAAATGC    |
| TNXB-31R    | CTCGATCACAGCAGGGAAG   |
| TNXB-32F    | GGCAGAGCTAAAGGCCACT   |
| TNXB-32R    | GCCAAGCCTGGAAGATAAAA  |
| TNXB-33F    | CCCCGTGAAGTACAAAGACC  |
| TNXB-33R    | CAAGCTGGTGTGCTTCTGTG  |
| TNXB-34.35F | CCCTCCTCGTTCTCTCTCAA  |
| TNXB-34.35R | ATCTGCAGAGGACTTCCAT   |
| TNXB-36.37F | AGGAAAGCAGGAAGAGGAG   |
| TNXB-36.37R | GAGAGAACGAGGAGGGTGAA  |
| TNXB-38.39F | ATGTCGAAAACACGTTCCAG  |
| TNXB-38.39R | GTAGGGTCTGTGGGGTGTGT  |
| TNXB-40.41F | ACGCCGATGGAGTAGTCAC   |
| TNXB-40.41R | CGTGTCCACCTCTTTCACC   |
| TNXB-42.43F | CTGTTACACTGTGGGGCTGA  |
| TNXB-42.43R | CACAGGGACTGGGGAAGTAC  |
| TNXB-44F    | AAGGACCTGGCTTCTCTCT   |
| TNXB-44R    | CAGAGGGAGCTGGAGTTGAT  |

**Table S3: Known and new TNXB variants in patients with VUR**

| RS number   | Exon/Intron | Nucleotide | Amino Acid Change |
|-------------|-------------|------------|-------------------|
| rs41270461  | 3           | 607G>A     | V203M             |
| rs1150752   | 3           | 904A>G     | T302A             |
| rs204896    | 3           | 1532G>A    | R511H             |
| rs41270458  | 3           | 1734C>T    | None              |
| rs17201602  | 3           | 1949G>A    | R650H             |
| rs204900    | 6           | 2761T>G    | S921A             |
| rs185819    | 9           | 3482A>G    | H1161R            |
| rs12211410  | 10          | 3764G>A    | R1255H            |
| rs61735731  | 10          | 4010G>A    | R1337H            |
| New         | 14          | 5155G>A    | V1719M            |
| rs17207923  | 16          | 5713G>A    | E1905K            |
| rs3749962   | 17          | 6030C>T    | None              |
| rs1150756   | 18          | 6288G>A    | None              |
| rs9469081   | 18          | 6379G>A    | V2127M            |
| rs150379644 | Intron 18   | (+)8A>T    | None              |
| rs9469080   | Intron 18   | (+)11T>C   | None              |
| rs204883    | 19          | 6696C>T    | None              |
| rs2239689   | Intron 20   | (-)24C>T   | None              |
| rs204885    | Intron 20   | (+)5G>A    | None              |
| rs204886    | 21          | 7251A>G    | None              |
| rs204887    | 21          | 7440T>C    | None              |
| rs1150757   | 21          | 7461C>T    | None              |
| rs2269429   | 21          | 7483G>A    | G2495S            |
| rs1009382   | 22          | 7553G>T    | G2518V            |
| rs12196385  | 22          | 7680C>T    | None              |
| rs2066982   | 22          | 7790G>A    | R2597Q            |
| rs369637    | 22          | 7797G>A    | None              |
| rs440160    | 24          | 8192C>G    | P2731R            |
| rs17207895  | 26          | 9050A>G    | K3017R            |
| rs41258944  | 28          | 9562G>A    | V3188I            |
| rs61740331  | 28          | 9672G>A    | None              |
| rs61740337  | 28          | 9699T>C    | None              |
| rs142041833 | 32          | 10723T>C   | S3575P            |
| rs12208609  | 32          | 10782C>T   | None              |
| rs141851943 | 32          | 10893G>A   | None              |
| rs374698    | 33          | 11142G>A   | None              |
| rs2856449   | 33          | 11088T>A   | None              |
| New         | 33          | 1184G>A    | None              |
| rs397948    | Intron 35   | (-)45T>C   | None              |
| rs143318192 | Intron 35   | (-)9A>G    | None              |
| rs2894232   | 35          | 11412T>C   | None              |
| rs2395085   | 35          | 11417A>G   | Q3806R            |
| rs75024733  | 36          | 11547A>G   | None              |
| rs78089407  | 36          | 11548C>A   | Q3850K            |
| rs28361049  | 36          | 11616G>A   | None              |
| rs28361048  | 36          | 11629G>A   | V3877I            |
| rs2734313   | Intron 36   | (+)10G>C   | None              |
| rs1135809   | 38          | 11921A>C   | N3974T            |
| rs7742632   | 39          | 11962C>A   | L3988I            |
| rs10456399  | 39          | 12011T>C   | M4004T            |
| rs113312810 | 40          | 12156C>G   | None              |
| rs114988582 | 40          | 12170A>T   | N4057I            |
| rs4959086   | 40          | 12180C>G   | C4060W            |
| rs4959085   | 40          | (+)5C>T    | None              |
| rs6457477   | 41          | 12224G>A   | R4075H            |
| rs4959084   | 43          | 12520G>A   | D4174N            |
| rs4959083   | 43          | 12530G>A   | S4177N            |
